# Supplementary material for: A Comparative Analysis of Deep Learning Models for Automated Cross-Preparation Diagnosis of Multi-Cell Liquid Pap Smear Images
Source: MDPI journal article supplement (doi:10.3390/diagnostics12081838), 2022-07-29
Supplement: s1 [file s1]

## **A Comparative Analysis of Deep Learning Models For Automated Cross-Preparation Diagnosis of Multi-Cell Liquid Pap Smear Images**

Yasmin Karasu Benyes<sup>1</sup>, E. Celeste Welch<sup>1</sup>, Abhinav Singhal<sup>2</sup>, Joyce Ou<sup>3</sup>, Anubhav Tripathi<sup>1</sup>  
<sup>1</sup>Center for Biomedical Engineering, School of Engineering, Brown University, Providence, RI, USA.

<sup>2</sup>Department of Computer Science and Engineering, Indian Institutes of Technology Delhi, Hauz Khas, New Delhi, India.

<sup>3</sup>Department of Pathology and Laboratory Medicine, Alpert Medical School, Brown University, Providence, RI, USA.

### **Supporting Documents**

Supplemental Figure S1: Accuracy and loss plots for training data for basic CNN model.

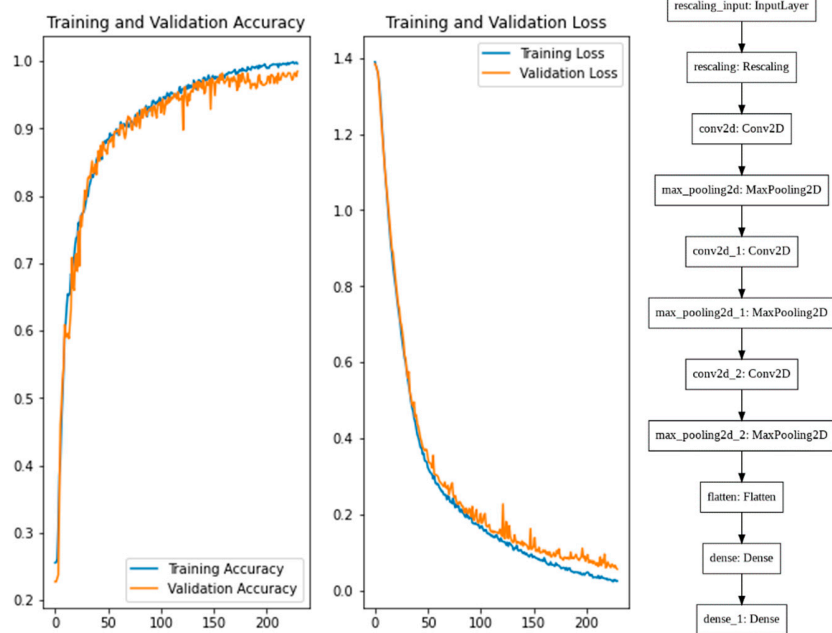

Supplemental Figure S2: Accuracy and loss plots for training data for AE CNN model.

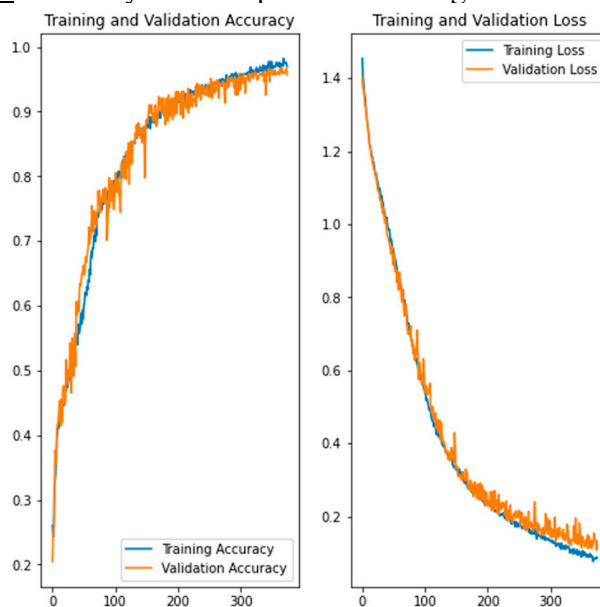

Supplemental Figure S3: Accuracy and loss plots for training data for best-performing single transfer model, ResNet50.

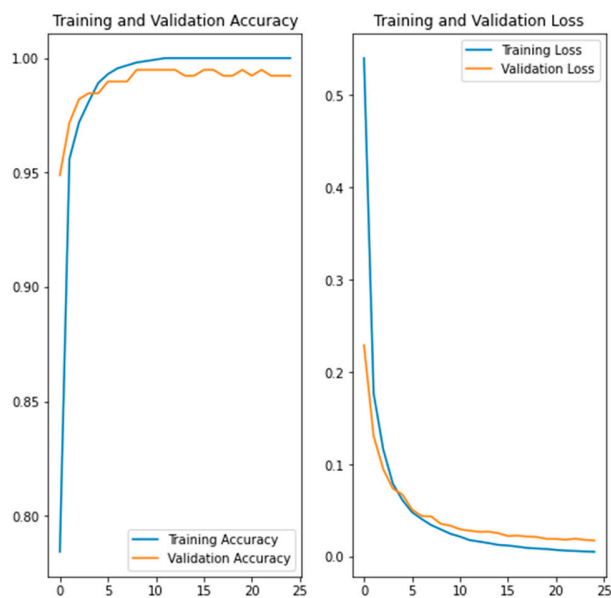

Supplemental Figure S4: Confusion matrix and classification reports for DenseNet121.

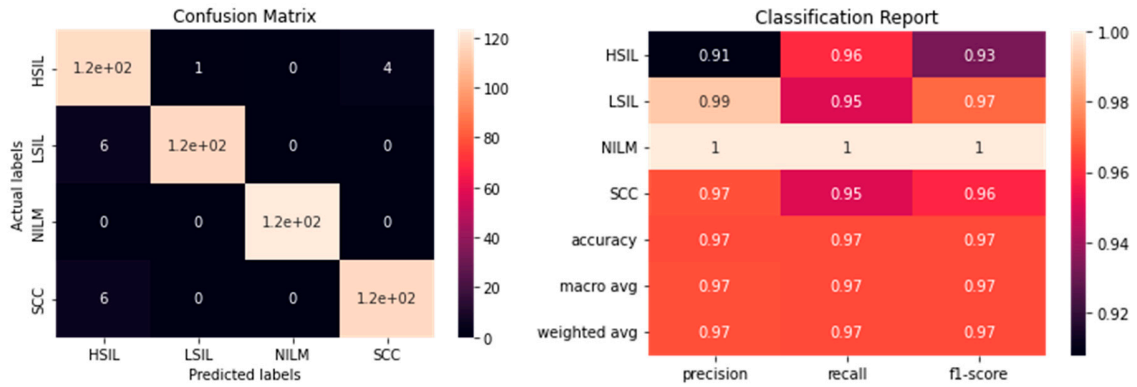

Supplemental Figure S5: Confusion matrix and classification report for ResNet101.

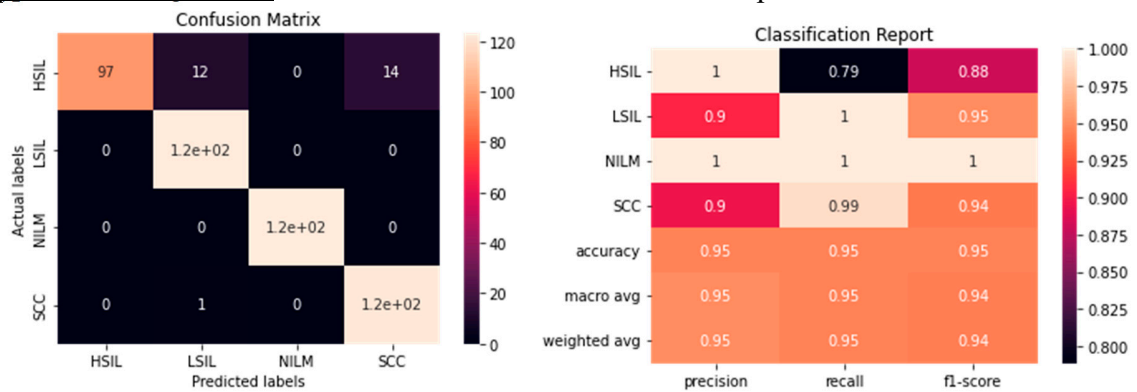

Supplemental Figure S6: Confusion matrix and classification report for ResNet152.

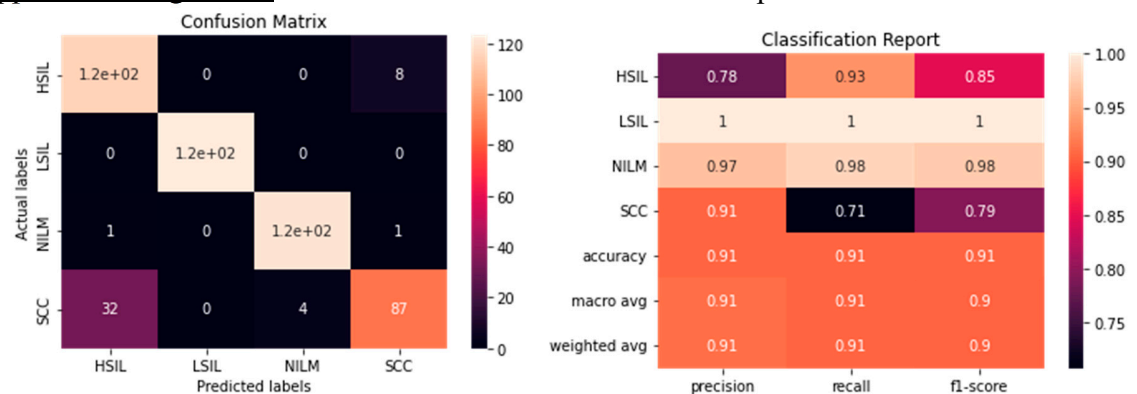

**Supplemental Figure S7: Confusion matrix and classification report for EfficientNetB0.**

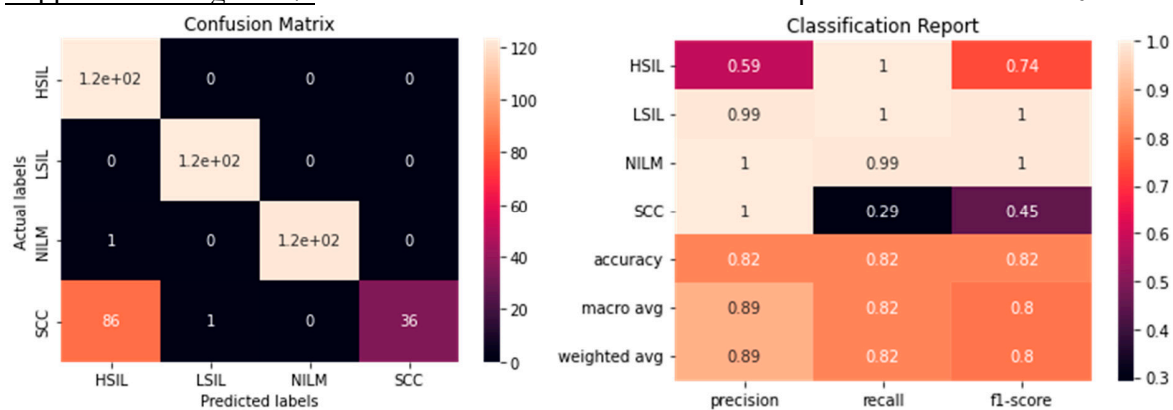

**Supplemental Table S1: Chi-square, P-value, T-value and standard deviations for each tested model.**

| Model          | Chi-Square | P-value | T-value | SD    |
|----------------|------------|---------|---------|-------|
| CNN            | 58.17      | <0.0001 | 51.62   | 17.32 |
| CNN+ AE        | 29.71      | <0.0001 | 100.8   | 9.256 |
| ResNet50       | 4.98       | 0.1733  | 532.4   | 1.826 |
| DenseNet121    | 17.23      | 0.0006  | 132.4   | 7.047 |
| ResNet101      | 24.64      | <0.0001 | 84.7    | 10.66 |
| ResNet152      | 67.41      | <0.0001 | 36.34   | 23.28 |
| EfficientNetB0 | 21.21      | <0.0001 | 41.41   | 17.75 |
| Ensemble       | 10.5       | 0.0148  | 274.2   | 3.512 |

Supplemental Figure S8: Plot of T-values for each tested model.

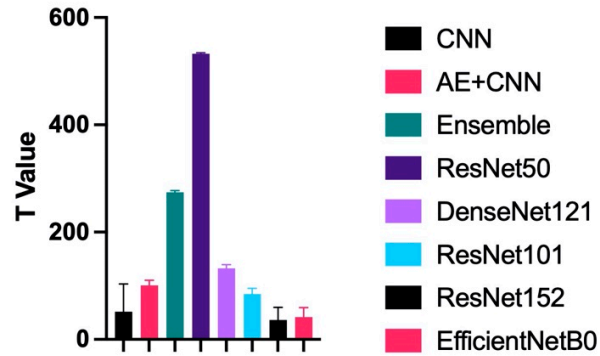

Supplemental Figure S9: Evaluation of the training and testing runtime for each model included in the analysis.

| Model          | Training Runtime (For 1959 Samples), Minutes | Testing Runtime Per Sample, Minutes |
|----------------|----------------------------------------------|-------------------------------------|
| CNN Model      | 18.55899691581726                            | 0.09384679794311523                 |
| AE CNN         | 580.802036523819 + 130.64781999588013        | 0.17501425743103027                 |
| ResNet50       | 105.51053142547607                           | 0.8113045692443848                  |
| DenseNet121    | 114.49975991249084                           | 2.1196017265319824                  |
| ResNet101      | 180.21313786506653                           | 1.648026466369629                   |
| ResNet152      | 245.04961323738098                           | 2.454149007797241                   |
| EfficientNetB0 | 86.03872275352478                            | 1.2509117126464844                  |
| Ensemble       | -                                            | 7.7521045207977295                  |

Supplemental Figure S10: Information on epoch number, learning rate, activation function, dropout, and bath size for each model included in the analysis.

| Model          | Epoch     | Learning Rate | Activation Function | Dropout | Batch Size |
|----------------|-----------|---------------|---------------------|---------|------------|
| CNN Model      | 230       | 5e-5          | relu                | -       | 16         |
| AE CNN         | 100 + 375 | 5e-5          | relu/sigmoid        | 0.2     | 16         |
| ResNet50       | 25        | 0.01          | relu                | -       | 32         |
| DenseNet121    | 25        | 0.01          | softmax             | -       | 32         |
| ResNet101      | 25        | 0.01          | relu                | -       | 32         |
| ResNet152      | 25        | 0.01          | sigmoid             | -       | 32         |
| EfficientNetB0 | 25        | 0.01          | softmax             | -       | 32         |
| Ensemble       | -         | -             | -                   | -       | -          |
